# Supplementary material
Source: Elsevier journal article supplement (https://www.sciencedirect.com/science/article/pii/S1885585724000422)
Supplement: mmc1 [file mmc1.pdf]

## **SUPPLEMENTARY DATA**

### **SUPPLEMENTARY METHODS**

#### **Procedures – PVI+D group**

Procedures were performed under general anesthesia. Antiarrhythmic medications were neither discontinued prior to ablation nor administered during the procedures. After achieving echography-guided femoral vein access, a 24-pole diagnostic catheter (Woven Orbiter, Boston Scientific Inc, United States) was placed around the tricuspid annulus with its distal part into the coronary sinus. Transseptal puncture with a conventional long sheath (SL1, Abbott Medical, United States) was performed and intravenous heparin was administered to achieve a target activated clotting time of 350 to 400 seconds. Steerable sheaths (Agilis, Abbott Medical, United States) were only used to improve catheter manipulation in selected difficult cases.

#### ***Mapping protocol and driver identification***

For mapping, bipolar voltage maps were created, with the threshold for dense scar set below 0.03 mV in all navigation systems, in order to allow annotation of low-voltage signals. For driver identification on the digital recorder (LabSystem Pro, Boston Scientific Inc., United States), filters for bipolar signals were set at 30 and 250 Hz, with a notch filter.

### ***Ablation protocol***

Power settings ranged from 30 to 50 W at the LA, 30 to 40W at the RA and 20 to 30W inside the coronary sinus. Automatic ablation indexes (Lesion Size Index and Ablation Index) were used when available. For drivers at the LA, ablation lines were delivered including the drivers' location through the line in these circumstances:

a) For drivers located within or adjacent to the pulmonary veins antra, circumferential PVI was performed including the driver within the line;

b) For drivers located at the LA roof, a roof line was deployed;

c) For drivers located at the anterior LA wall, an anterior mitral line was created (from the anterior mitral annulus to the right superior or left superior pulmonary vein, or to a roof line if previously deployed, according to operators' preferences); to cover several areas with drivers, or to ablate ATs in the event of AF conversion, some patients received 2 anterior mitral lines (ie, from the mitral annulus to the right superior pulmonary vein *and* from the mitral annulus to the left superior pulmonary vein), in most cases sharing a common anterior connection to the mitral annulus (*Y-shaped* line);

d) For drivers located at the posterior wall, focal ablation was performed if the driver covered a small area; for larger drivers, a line between a right pulmonary vein and a left pulmonary vein, or a posterior box enclosing the driver (ie, roof line plus posterior line from a right pulmonary vein to a left pulmonary), was preferred; and

e) For drivers located inside the coronary sinus, focal ablation was generally performed, but coronary sinus empirical defragmentation from the ostium to the location of the driver was also valid.

Circumferential PVI was performed in all patients after ablation of LA drivers and prior to RA mapping (if performed), or during ablation of LA drivers if these were located related to the pulmonary vein antra.

After conversion to sinus rhythm, bidirectional block at the ablation lines (performed in the index or previous procedures) was checked, and ablation was performed if gaps were present. Inducibility of atrial arrhythmias was not tested at the end of the procedures.

### **Procedures – PVI-only group**

Procedures were performed under deep sedation or general anesthesia. Antiarrhythmic drugs were managed as in the PVI+D group. In patients with circumferential radiofrequency ablation, the same ablation catheters, navigation systems and power settings as in the PVI+D were used, but without high-density mapping of the LA in most cases. After PVI, electrical cardioversion was performed to achieve sinus rhythm. Bidirectional block of all pulmonary veins was tested.

## **SUPPLEMENTARY RESULTS**

### **Identification of drivers and clinical results according to the different navigation systems and mapping catheters in the PVI+D group**

In the PVI+D group, 35 cases (70%) were performed using Carto3 and PentaRay NAV; 9 cases (18%) using Rhythmia and IntellaMap ORION; and 6 cases (12%) using EnSite and Advisor HD Grid. The total number of drivers (FCEs and STD+F) and the detection of regions with STD+F were similar using the 3 mapping catheters ( $P = .453$  and  $P = .388$ , respectively). However, FCEs were more frequently found in cases performed with ORION (78%) and HD Grid (50%) than with PentaRay (31%) ( $P = .039$ ); this means that, although all catheters seem capable of reliably detecting fractionation

and STD, ORION an HD Grid might be more prone to detecting *continuous* fractionation, possibly due to a smaller interelectrode distance and different electrode spatial configuration. However, given the limited sample size, these results must be interpreted with caution.

AF conversion rate ( $P = .344$ ) and 1-year freedom from atrial arrhythmias ( $P = .501$ ) were similar between the 3 navigation systems.

### AF cycle length at sites with drivers and its relationship with atrial cycle length

Table 4 of the supplementary data shows the mean AF cycle length (CL) recorded at each driver (DCL), compared with the mean AF CL recorded at neighboring regions of the index atrium (ACL) without drivers, which were mapped at similar moments. Supplementary figure 3 shows representative examples and the methodology for CL measurements. Globally, there was a CL gradient between driver regions (with faster CL) and neighboring regions without drivers; the mean difference between DCL and ACL ( $\Delta\text{DCL-ACL}$ ) was  $-6.4 \pm 11.9$  ms, and 73% of drivers showed a shorter CL than neighboring regions. Moreover,  $\Delta\text{DCL-ACL}$  was explored as a predictor of AF conversion during ablation of a particular driver site; however, it was similar for drivers in which ablation achieved AF conversion and drivers in which it was not achieved ( $-8.5 \pm 9.5$  ms vs  $-6.2 \pm 12.2$  ms,  $P = .388$ ).

DCL was similar at sites with FCEs and sites with STD+F ( $162.8 \pm 26.9$  ms vs  $158.4 \pm 26.9$  ms,  $P = .316$ );  $\Delta\text{DCL-ACL}$  was also similar between the 2 driver patterns ( $P = .852$ ), as well as for drivers in the LA, RA or coronary sinus ( $P = .432$ ).

Mean  $\Delta\text{DCL-ACL}$  was calculated for each patient (considering all drivers), and was similar for patients with and without AF conversion ( $-7.9 \pm 6.7$  ms vs  $-6.2 \pm 5.6$  ms,  $P = .358$ ). In addition, no differences were noted between patients with or without 1-year atrial arrhythmia recurrences ( $-6.7 \pm 5.0$  ms vs  $-7.1 \pm 6.6$  ms,  $P = .840$ ).

Finally, mean 'global' left atrial CL was explored as a possible predictor of AF conversion or arrhythmia recurrences (as shorter mean atrial CL might be related to poorer results). Mean left atrial CL was calculated as the mean of the CL of 3 different locations away from drivers, with one of these being the LAA unless drivers were adjacent to it. Mean left atrial CL was similar between patients with or without AF conversion ( $169 \pm 17$  ms vs  $159 \pm 21$  ms,  $P = .164$ ), and between patients with or without 1-year atrial arrhythmia recurrences ( $165 \pm 19$  ms vs  $158 \pm 22$  ms,  $P = .315$ ).

### **Methodology used for automatic fractionation maps using EnSite and Rhythmia navigation systems in the PVI+D group**

For cases performed with EnSite ( $n = 6$ ), the fractionation module, which automatically counts the number of deflections within the window of interest (WOI), was used. To do so, we created bipolar fractionation *turbomaps* using a low-voltage ID of 0.04 mV and a WOI comprising 90% of the AF mean CL (calculated as the mean AF CL of 3 different sites of the atrium of interest, with one of these sites being the LAA or RAA); the reason for not including 100% of the AF CL was to avoid the presence of 2 different AF EGMs within the WOI, which would be considered as the same EGM for counting deflections and could imply false fractionation detection. A threshold of 4 deflections was used for considering fractionation. Only clusters of fractionated points that created an *area* of fractionation were considered; individual scattered fractionated points were not taken into consideration. Areas  $< 0.5$  cm away were considered as the same area of fractionation.

For cases performed with Rhythmia ( $n = 9$ ), we used the LUMIPOINT module tool for automatic fractionated EGMs detection, which considers the number of deflections of *individual* EGMs, so the selection of the WOI is less relevant. Hence, we switched the LUMIPOINT module on using the same bipolar voltage maps created during mapping (ie, using the same WOI). We used the nominal threshold of 7 deflections for considering fractionation; as our definition of subjectively

detected fractionation used 4 deflections, we also explored a threshold of 4 deflections for the LUMIPOINT module, but the positive predictive value decreased without a relevant sensitivity improvement. When the LUMIPOINT module is on, areas with fractionated EGMs are highlighted; only areas with > 2 fractionated points included were counted. Areas < 0.5 cm away were also considered as the same area of fractionation.

### **Results according to the different ablation energy (cryoablation or radiofrequency) in the PVI-only group**

As all procedures in the PVI+D group were performed with radiofrequency ablation, we performed a subanalysis considering the effect of radiofrequency vs cryoballoon ablation in the PVI-only group. A multivariate Cox proportional-hazards analysis for the primary endpoint, including study group (PVI+D vs PVI-only) and ablation energy (radiofrequency vs cryoablation) as independent variables, showed that the ablation energy was not an independent predictor of clinical results ( $P = .300$  in the propensity score-matched analysis and  $P = .724$  including all patients).

In the PVI-only group, similar 1-year survival free from atrial arrhythmias was observed in patients treated with radiofrequency ablation ( $n = 169$ ) or cryoballoon ablation ( $n = 20$ ) ( $P = .452$ ).

### **Secondary analysis including all patients treated with PVI alone during the study period**

In the secondary analysis that included all 189 patients treated with a PVI-only approach, the results of both primary and secondary endpoints were similar to those from the full cohort of patients (supplementary figure 4). Compared with the PVI-only group, patients in the PVI-D group had less atrial arrhythmia recurrences at 1 year of follow-up (30.6% vs 48%, log-rank  $P = .048$ ), and at the last follow-up after one (46% vs 62%, log-rank  $P = .014$ ) or multiple procedures (28% vs 49.7%,

log-rank  $P = .004$ ), and experienced less progression to permanent AF (10% vs 31.2%, log-rank  $P = .003$ ).

AF conversion to sinus rhythm ( $n = 3$ ) or AT ( $n = 1$ , perimitral flutter) with ablation was observed in 4 patients (2.1%) in the PVI-only group (2.1%); in all these patients, conversion occurred during the ablation of the right superior pulmonary vein.

### Results according to the operator

Procedures from the PVI+D group were performed by 4 operators, although most cases ( $n = 43$ , 86%) were performed by the same operator (operator #1). Six operators, including these 4, performed the PVI-only procedures. PVI-only procedures performed by operator #1 showed similar 1-year survival free from atrial arrhythmias to those performed by other operators ( $P = .820$  in the propensity score-matched analysis and  $P = .708$  including all patients). A multivariate Cox regression analysis for the primary endpoint, including study group (PVI+D vs PVI-only) and operator (operator #1 vs others) as independent variables, showed that the operator was not an independent predictor of clinical results ( $P = .532$  in the propensity score-matched analysis and  $P = .518$  including all patients).

**SUPPLEMENTARY TABLES**

**Table 1 of the supplementary data:** Basal characteristics including all patients.

|                                               | <b>PVI+D<br/>(n = 50)</b> | <b>PVI alone<br/>(n = 189)</b> | <b>P</b> |
|-----------------------------------------------|---------------------------|--------------------------------|----------|
| Age, y                                        | 61.2 ± 9.5                | 63.1 ± 10.1                    | .223     |
| Female sex, %                                 | 12 (24)                   | 46 (24)                        | .960     |
| Hypertension, %                               | 33 (66)                   | 106 (56)                       | .206     |
| Diabetes mellitus, %                          | 13 (26)                   | 29 (15)                        | .078     |
| Obstructive sleep apnea, %                    | 6 (12)                    | 19 (10)                        | .689     |
| Body mass index, kg/m <sup>2</sup>            | 29.7 ± 4.5                | 29.2 ± 4.7                     | .476     |
| Glomerular filtration rate, mL/min            | 74.5 ± 18.1               | 75.1 ± 17.2                    | .844     |
| Left ventricular ejection fraction, %         | 55 [44-60]                | 60 [51-64]                     | .006     |
| CHA <sub>2</sub> DS <sub>2</sub> -VASc score  | 2 [1-3]                   | 2 [1-3]                        | .069     |
| Indexed left atrial volume, mL/m <sup>2</sup> | 36 [29-49]                | 35 [30-44]                     | .532     |
| Duration of the ongoing AF episode, mo        | 5 [3-10]                  | 4 [3-7.5]                      | .511     |
| Long-lasting persistent AF, %                 | 11 (22)                   | 22 (12)                        | .059     |
| Significant structural heart disease, %       | 24 (48)                   | 73 (39)                        | .230     |
| On class I or III antiarrhythmic drugs, %     | 10 (20)                   | 53 (28)                        | .251     |
| Prior ablation procedures, %                  | 17 (34)                   | 34 (18)                        | .014     |
| PVI                                           | 15 (30)                   | 21 (11)                        |          |
| CTI ablation                                  | 7 (14)                    | 16 (8.4)                       |          |
| Other                                         | 0                         | 2 (1) *                        |          |
| Prior cardiac surgery, %                      | 4 (8)                     | 6 (3.1)                        | .130     |

AT = atrial tachycardia. CTI = cavotricuspid isthmus. PVI+D = pulmonary vein isolation plus driver ablation. PVI = pulmonary vein isolation.

Data are shown as mean ± standard deviation, median [interquartile range] or No. (%).

\* Focal AT (n = 1) and perimitral flutter (n = 1).



**Table 2 of the supplementary data.**

Procedural complications and mortality during follow-up.

|                            | PVI+D<br>(n = 50)                                                                                                                                                                                                              | PVI alone<br>(n = 50)                                                                                         |
|----------------------------|--------------------------------------------------------------------------------------------------------------------------------------------------------------------------------------------------------------------------------|---------------------------------------------------------------------------------------------------------------|
| Complications              | <ul style="list-style-type: none"> <li>- Atrioesophageal fistula, n = 1</li> <li>- Transient neuropathic pain at the right thigh, n = 1</li> <li>- Low-risk acute pulmonary embolism during in-hospital stay, n = 1</li> </ul> | <ul style="list-style-type: none"> <li>- Phrenic nerve palsy, n = 1</li> </ul>                                |
| Deaths and causes of death | <ul style="list-style-type: none"> <li>- Atrioesophageal fistula, n = 1</li> </ul>                                                                                                                                             | <ul style="list-style-type: none"> <li>- Intracranial hemorrhage, n = 1</li> <li>- COVID-19, n = 1</li> </ul> |

**Table 3 of the supplementary data.** Detailed ablation set performed in each patient.

| Patient # | Duration of ongoing AF episode, mo | Mapping catheter/ navigation system | Mapping: LA or LA + RA | Number of sites with FCEs | Number of sites with STD+F <sup>a</sup> | Effect of driver ablation | Ablation set                                                                        | RF time, min | Atrial ablated area <sup>b</sup>         | One-year recurrence | Progression to permanent AF |
|-----------|------------------------------------|-------------------------------------|------------------------|---------------------------|-----------------------------------------|---------------------------|-------------------------------------------------------------------------------------|--------------|------------------------------------------|---------------------|-----------------------------|
| 1         | 4                                  | PentaRay Carto3                     | LA                     | 1                         |                                         | AT                        | PVI (FCEs at RSPV)                                                                  | 48.6         | LA: 12.3%                                | No                  | No                          |
|           |                                    |                                     |                        |                           |                                         |                           | CTI (conversion to common atrial flutter)                                           | 4.4          |                                          |                     |                             |
|           |                                    |                                     |                        |                           |                                         |                           | Focal AT at posterior wall of LA (spontaneous)                                      | 2.8          |                                          |                     |                             |
| 2         | 2                                  | PentaRay Carto3                     | LA + RA                | 2                         | 3                                       | No effect                 | Gap at RIPV (prior PVI)                                                             | 5.8          | LA: 7.8%<br>RA: 2.3%<br>Biatrial: 4.8%   | Yes                 | Yes                         |
|           |                                    |                                     |                        |                           |                                         |                           | Focal at anteroseptal LA (FCEs)                                                     | 4.9          |                                          |                     |                             |
|           |                                    |                                     |                        |                           |                                         |                           | Roof line (STD+F)                                                                   | 12.5         |                                          |                     |                             |
|           |                                    |                                     |                        |                           |                                         |                           | Mini-line at posterior LA to RIPV (STD+F)                                           | 4.5          |                                          |                     |                             |
|           |                                    |                                     |                        |                           |                                         |                           | Focal at CS ostium (FCEs)                                                           | 3.1          |                                          |                     |                             |
|           |                                    |                                     |                        |                           |                                         |                           | Focal at lateral RA (STD+F)                                                         | 1.6          |                                          |                     |                             |
| 3         | 2                                  | HD Grid EnSite P.                   | LA                     | 1                         |                                         | SR                        | Wide gap at LSPV with FCEs (prior PVI)                                              | 18.2         | LA: 3.6%                                 | No                  | Yes                         |
| 4         | 3                                  | PentaRay Carto3                     | LA                     | 0                         | 1                                       | No effect                 | PVI (prior PVI but all veins reconnected)                                           | 24.8         | LA: 9.1%                                 | Yes                 | No                          |
|           |                                    |                                     |                        |                           |                                         |                           | Roof line (STD+F)                                                                   | 3.1          |                                          |                     |                             |
|           |                                    |                                     |                        |                           |                                         |                           | ASL (induced SRSR at anterior LA)                                                   | 7.7          |                                          |                     |                             |
|           |                                    |                                     |                        |                           |                                         |                           | CTI (prior common atrial flutter)                                                   | 12.5         |                                          |                     |                             |
| 5         | 5                                  | PentaRay Carto3                     | LA + RA                | 0                         | 5                                       | No effect                 | PVI (STD+F at RSPV and RIPV)                                                        | 26.2         | LA: 16.1%<br>RA: 4.6%<br>Biatrial: 10.1% | No                  | No                          |
|           |                                    |                                     |                        |                           |                                         |                           | Roof line (STD+F)                                                                   | 8.4          |                                          |                     |                             |
|           |                                    |                                     |                        |                           |                                         |                           | CS defragmentation (STD+F)                                                          | 6.8          |                                          |                     |                             |
|           |                                    |                                     |                        |                           |                                         |                           | Focal at lateral RA (STD+F)                                                         | 7.4          |                                          |                     |                             |
|           |                                    |                                     |                        |                           |                                         |                           | CTI (transient stabilization into common atrial flutter during lateral RA ablation) | 3.2          |                                          |                     |                             |
| 6         | 2                                  | ORION Rhythmia                      | LA                     | 2                         |                                         | AT                        | PVI (FCE at RSPV)                                                                   | 28.6         | LA: 3.3%                                 | Yes                 | No                          |
|           |                                    |                                     |                        |                           |                                         |                           | Focal at posterolateral mitral annulus (FCEs)                                       | 4.3          |                                          |                     |                             |
|           |                                    |                                     |                        |                           |                                         |                           | ASL (AF conversion to SRSR at RSPV anterior antrum)                                 | 5.3          |                                          |                     |                             |
|           |                                    |                                     |                        |                           |                                         |                           | Focal at CS ostium (SRSR)                                                           | 2.1          |                                          |                     |                             |
| 7         | 3                                  | PentaRay Carto3                     | LA                     | 0                         | 0                                       | No effect                 | PVI (no drivers)                                                                    | 30.8         | LA: 7.6%                                 | No                  | No                          |
| 8         | 2                                  | PentaRay Carto3                     | LA + RA                | 2                         |                                         | SR                        | PVI                                                                                 | 20.0         | LA: 6.2%<br>RA: 4.9%<br>Biatrial: 5.5%   | No                  | No                          |
|           |                                    |                                     |                        |                           |                                         |                           | Roof line (FCEs)                                                                    | 9.2          |                                          |                     |                             |
|           |                                    |                                     |                        |                           |                                         |                           | Cluster ablation at lateral RA (FCEs near prior atriotomy)                          | 13.4         |                                          |                     |                             |
| 9         | 3                                  | PentaRay Carto3                     | LA + RA                | 2                         | 6                                       | No effect                 | Gap at LSPV (prior PVI)                                                             | 7.8          | LA: 11.9%<br>RA: 8%                      | No                  | No                          |
|           |                                    |                                     |                        |                           |                                         |                           | ASL (FCEs antral to anterior RSPV isolation line)                                   | 9.7          |                                          |                     |                             |

|    |    |                   |         |   |   |           |                                                                                                                   |      |                                          |     |    |
|----|----|-------------------|---------|---|---|-----------|-------------------------------------------------------------------------------------------------------------------|------|------------------------------------------|-----|----|
|    |    |                   |         |   |   |           | MAL (FCEs at anterior LA near LAA base and STD+F at anterior mitral annulus) <sup>c</sup>                         | 7.3  | Biatrial:<br>9.8%                        |     |    |
|    |    |                   |         |   |   |           | Roof line (STD+F)                                                                                                 | 10.9 |                                          |     |    |
|    |    |                   |         |   |   |           | Mini-line at LA floor near RIPV (STD+F)                                                                           | 6.3  |                                          |     |    |
|    |    |                   |         |   |   |           | Focal at CS ostium (STD+F)                                                                                        | 5.3  |                                          |     |    |
|    |    |                   |         |   |   |           | Focal at superolateral RA (STD+F)                                                                                 | 8.1  |                                          |     |    |
|    |    |                   |         |   |   |           | Focal at inferolateral RA (STD+F)                                                                                 | 3.5  |                                          |     |    |
| 10 | 2  | HD Grid EnSite P. | LA      | 1 |   | SR        | PVI (FCEs at posterior carina of right PVs)                                                                       | 37.3 | LA: 5.3%                                 | No  | No |
| 11 | 4  | PentaRay Carto3   | LA      | 2 | 4 | No effect | PVI (STD+F at RSPV and RIPV)                                                                                      | 26.4 | LA: 20.4%                                | Yes | No |
|    |    |                   |         |   |   |           | Posterior box: roof line (FCEs) + line between RIPV and LIPV (STD+F at posterior LA wall)                         | 7.8  |                                          |     |    |
|    |    |                   |         |   |   |           | ASL (FCEs at anterior LA)                                                                                         | 2.7  |                                          |     |    |
|    |    |                   |         |   |   |           | Focal at CS ostium (STD+F)                                                                                        | 1.3  |                                          |     |    |
| 12 | 10 | PentaRay Carto3   | LA + RA | 0 | 5 | No effect | PVI                                                                                                               | 18.6 | LA: 27.9%<br>RA: 4.7%<br>Biatrial: 14.9% | No  | No |
|    |    |                   |         |   |   |           | ASL (STD+F at anteroseptal LA)                                                                                    | 12.6 |                                          |     |    |
|    |    |                   |         |   |   |           | MAL (STD+F at anterior LA near LAA base) <sup>c</sup>                                                             | 2.5  |                                          |     |    |
|    |    |                   |         |   |   |           | Focal at CS ostium (STD+F)                                                                                        | 4.8  |                                          |     |    |
|    |    |                   |         |   |   |           | Focal at septal RA (STD+F)                                                                                        | 3.8  |                                          |     |    |
|    |    |                   |         |   |   |           | Focal at lateral RA (STD+F)                                                                                       | 5.4  |                                          |     |    |
| 13 | 2  | HD Grid EnSite P. | LA + RA | 0 | 5 | No effect | PVI (STD+F at ridge)                                                                                              | 34.2 | LA: 25.9%<br>RA: 2.8%<br>Biatrial: 12.4% | Yes | No |
|    |    |                   |         |   |   |           | Roof line (STD+F)                                                                                                 | 4.9  |                                          |     |    |
|    |    |                   |         |   |   |           | ASL (STD+F near anterior antrum of RSPV)                                                                          | 11.2 |                                          |     |    |
|    |    |                   |         |   |   |           | MAL (STD+F at anterior LA near LAA base)                                                                          | 9.6  |                                          |     |    |
|    |    |                   |         |   |   |           | Focal at septal RA (STD+F)                                                                                        | 3.8  |                                          |     |    |
| 14 | 12 | PentaRay Carto3   | LA      | 0 | 3 | No effect | PVI                                                                                                               | 27.8 | LA: 20.3%                                | No  | No |
|    |    |                   |         |   |   |           | Roof line (STD+F) + posterior vertical mini-line from roof line (STD+F)                                           | 7.8  |                                          |     |    |
|    |    |                   |         |   |   |           | ASL (STD+F near anterior antrum of RSPV)                                                                          | 9.2  |                                          |     |    |
| 15 | 4  | PentaRay Carto3   | LA      | 0 | 3 | No effect | PVI                                                                                                               | 27.8 | LA: 11.2%                                | No  | No |
|    |    |                   |         |   |   |           | Posterior box: roof line (STD+F) + line between left PVs carina and right PVs carina (STD+F at posterior LA wall) | 21.9 |                                          |     |    |
|    |    |                   |         |   |   |           | MAL (STD+F at anterior LA near LAA base)                                                                          | 8.7  |                                          |     |    |
| 16 | 3  | PentaRay Carto3   | LA + RA | 0 | 8 | No effect | <i>PVI performed in prior procedure, no gaps</i>                                                                  |      | LA: 18.9%<br>RA: 8.4%<br>Biatrial: 13.8% | No  | No |
|    |    |                   |         |   |   |           | Anterior extension of RSPV isolation line (STD+F)                                                                 | 12.5 |                                          |     |    |
|    |    |                   |         |   |   |           | CTI (gap from prior procedure)                                                                                    | 5.4  |                                          |     |    |
|    |    |                   |         |   |   |           | Posterior box: roof line (STD+F) + line between RIPV and LIPV (STD+F at posterior LA wall)                        | 22.9 |                                          |     |    |
|    |    |                   |         |   |   |           | ASL (STD+F at anterior LA)                                                                                        | 11.6 |                                          |     |    |
|    |    |                   |         |   |   |           | Focal at posteroseptal LA near RIPV antrum (STD+F)                                                                | 2.6  |                                          |     |    |

|    |    |                 |         |   |   |           |                                                                                                |      |                                          |     |    |
|----|----|-----------------|---------|---|---|-----------|------------------------------------------------------------------------------------------------|------|------------------------------------------|-----|----|
|    |    |                 |         |   |   |           | Line from high lateral RA wall to IVC (STD+F at superolateral RA and inferolateral RA)         | 24.6 |                                          |     |    |
|    |    |                 |         |   |   |           | Focal at CS ostium (STD+F)                                                                     | 4.1  |                                          |     |    |
| 17 | 6  | PentaRay Carto3 | LA      | 0 | 3 | AT        | PVI (STD+F at ridge and RSPV)                                                                  | 55.8 | LA: 15.5%                                | No  | No |
|    |    |                 |         |   |   |           | MAL (STD+F at anterior LA)                                                                     | 4.8  |                                          |     |    |
|    |    |                 |         |   |   |           | ASL (AF conversion to peri-right PVs flutter) <sup>c</sup>                                     | 10.1 |                                          |     |    |
| 18 | 2  | ORION Rhythmia  | LA      | 3 |   | SR        | <i>PVI performed in prior procedure, no gaps</i>                                               |      | LA: 4.1%                                 | No  | No |
|    |    |                 |         |   |   |           | Focal at posterior roof near LSPV (FCEs)                                                       | 0.5  |                                          |     |    |
|    |    |                 |         |   |   |           | ASL (FCEs at anterior mitral annulus and RSPV anterior antrum)                                 | 10.5 |                                          |     |    |
|    |    |                 |         |   |   |           | CTI (prior common atrial flutter)                                                              | 4.4  |                                          |     |    |
| 19 | 7  | PentaRay Carto3 | LA + RA | 2 | 4 | AT        | PVI (FCEs at RSPV)                                                                             | 32.1 | LA: 20.2%<br>RA: 4.7%<br>Biatrial: 11.8% | No  | No |
|    |    |                 |         |   |   |           | Posterior line between RIPV and LIPV (FCEs)                                                    | 7.9  |                                          |     |    |
|    |    |                 |         |   |   |           | ASL (STD+F anterior LA)                                                                        | 8.1  |                                          |     |    |
|    |    |                 |         |   |   |           | MAL (STD+F at anterior LA near LAA base) <sup>c</sup>                                          | 5.4  |                                          |     |    |
|    |    |                 |         |   |   |           | CS defragmentation (STD+F at ostial and mid CS)                                                | 6.1  |                                          |     |    |
|    |    |                 |         |   |   |           | Line between SVC and scar at posterior RA (AF conversion to upper loop reentry atrial flutter) | 10.8 |                                          |     |    |
| 20 | 1  | PentaRay Carto3 | LA      | 0 | 4 | SR        | PVI (3 sites with STD-F at RSPV, 1 at LIPV)                                                    | 30.7 | LA: 4.1%                                 | No  | No |
|    |    |                 |         |   |   |           | Focal at anterior RSPV antrum (spontaneous SRSR)                                               | 1.4  |                                          |     |    |
| 21 | 3  | PentaRay Carto3 | LA + RA | 2 | 3 | No effect | Gaps at ridge and RSPV (prior PVI; FCEs at ridge)                                              | 12.8 | LA: 10.2%<br>RA: 5.8%<br>Biatrial: 7.2%  | No  | No |
|    |    |                 |         |   |   |           | Roof line (FCEs)                                                                               | 5.5  |                                          |     |    |
|    |    |                 |         |   |   |           | "T" line between roof line and anterior mitral annulus (STD+F at anterior LA)                  | 7.2  |                                          |     |    |
|    |    |                 |         |   |   |           | CS defragmentation (STD+F)                                                                     | 5.4  |                                          |     |    |
|    |    |                 |         |   |   |           | Posterior RA line between SVC and IVC (STD+F at crista terminalis)                             | 8.6  |                                          |     |    |
| 22 | 10 | PentaRay Carto3 | LA      | 5 |   | SR        | PVI (FCEs at RSPV, RIPV, LIPV and ridge)                                                       | 34.2 | LA: 9.9%                                 | Yes | No |
|    |    |                 |         |   |   |           | Roof line (FCEs)                                                                               | 18.0 |                                          |     |    |
|    |    |                 |         |   |   |           | ASL (mechanically induced perimitral flutter)                                                  | 12.6 |                                          |     |    |
| 23 | 19 | PentaRay Carto3 | LA      | 0 | 4 | AT        | PVI (STD+F at RSPV)                                                                            | 37.1 | LA: 22.1%                                | No  | No |
|    |    |                 |         |   |   |           | Posterior box (large area with STD+F)                                                          | 9.3  |                                          |     |    |
|    |    |                 |         |   |   |           | ASL (STD+F anterior LA)                                                                        | 10.9 |                                          |     |    |
|    |    |                 |         |   |   |           | MAL (STD+F at anterior LA near LAA base) <sup>c</sup>                                          | 4.9  |                                          |     |    |
|    |    |                 |         |   |   |           | CTI (AF conversion to common atrial flutter)                                                   | 1.9  |                                          |     |    |
| 24 | 9  | PentaRay Carto3 | LA + RA | 0 | 5 | No effect | PVI (STD+F at RSPV)                                                                            | 33.2 | LA: 39.1%<br>RA: 2.8%<br>Biatrial:       | No  | No |
|    |    |                 |         |   |   |           | Posterior box (large area with STD+F)                                                          | 13.5 |                                          |     |    |
|    |    |                 |         |   |   |           | MAL (STD+F at anterior LA near LAA base)                                                       | 24.4 |                                          |     |    |
|    |    |                 |         |   |   |           | Focal at mitral isthmus (STD+F)                                                                | 3.7  |                                          |     |    |

|    |    |                 |         |   |   |           |                                                                                            |      |                                          |     |     |
|----|----|-----------------|---------|---|---|-----------|--------------------------------------------------------------------------------------------|------|------------------------------------------|-----|-----|
|    |    |                 |         |   |   |           | Focal at inferolateral RA near IVC (STD+F)                                                 | 3.5  | 19.0%                                    |     |     |
| 25 | 5  | PentaRay Carto3 | LA      | 0 | 3 | AT        | PVI (STD+F at RSPV)                                                                        | 40.6 | LA: 29.1%<br>RA: 2.4%<br>Biatrial: 17.7% | Yes | No  |
|    |    |                 |         |   |   |           | Posterior box: roof line (STD+F) + line between RIPV and LIPV (STD+F at posterior LA wall) | 18.8 |                                          |     |     |
|    |    |                 |         |   |   |           | CTI (AF conversion to common atrial flutter)                                               | 4.1  |                                          |     |     |
|    |    |                 |         |   |   |           | ASL (common atrial flutter conversion to SRSR at anterior LA)                              | 19.2 |                                          |     |     |
|    |    |                 |         |   |   |           | MAL (SRSR conversion to SRSR at LAA base) <sup>c</sup>                                     | 10.0 |                                          |     |     |
| 26 | 11 | PentaRay Carto3 | LA      | 2 | 4 | AT        | PVI (FCEs at RSPV)                                                                         | 33.9 | LA: 28.9%                                | No  | No  |
|    |    |                 |         |   |   |           | Posterior box: roof line (FCEs) + line between RIPV and LIPV (STD+F at posterior LA wall)  | 15.5 |                                          |     |     |
|    |    |                 |         |   |   |           | ASL (STD+F at anterior LA)                                                                 | 9.1  |                                          |     |     |
|    |    |                 |         |   |   |           | Focal at ridge (STD+F)                                                                     | 4.3  |                                          |     |     |
|    |    |                 |         |   |   |           | CS defragmentation (STD+F)                                                                 | 6.9  |                                          |     |     |
|    |    |                 |         |   |   |           | MAL (AF conversion to SRSR at LAA base) <sup>c</sup>                                       | 6.1  |                                          |     |     |
|    |    |                 |         |   |   |           | CTI (SRSR conversion to common atrial flutter)                                             | 3.7  |                                          |     |     |
| 27 | 5  | PentaRay Carto3 | LA + RA | 0 | 5 | No effect | PVI (STD+F at RSPV and ridge)                                                              | 43.2 | LA: 14.1%<br>RA: 1.6%<br>Biatrial: 7.8%  | Yes | Yes |
|    |    |                 |         |   |   |           | Posterior line between RIPV and LIPV (STD+F)                                               | 4.2  |                                          |     |     |
|    |    |                 |         |   |   |           | MAL (STD+F at anterior LA near LAA base)                                                   | 8.3  |                                          |     |     |
|    |    |                 |         |   |   |           | CS defragmentation (STD+F)                                                                 | 11.7 |                                          |     |     |
|    |    |                 |         |   |   |           | Focal at CS ostium (small re-entry after electrical cardioversion of AF)                   | 4.8  |                                          |     |     |
| 28 | 4  | PentaRay Carto3 | LA + RA | 0 | 4 | AT        | PVI                                                                                        | 51.4 | LA: 21.5%<br>RA: 4.2%<br>Biatrial: 14.1% | No  | No  |
|    |    |                 |         |   |   |           | Posterior box: roof line (STD+F) + line between RIPV and LIPV (STD+F at posterior LA wall) | 10.5 |                                          |     |     |
|    |    |                 |         |   |   |           | MAL (STD+F at anterior LA near LAA)                                                        | 16.7 |                                          |     |     |
|    |    |                 |         |   |   |           | CS defragmentation (STD+F)                                                                 | 4.1  |                                          |     |     |
|    |    |                 |         |   |   |           | CTI (conversion to common atrial flutter)                                                  | 6.6  |                                          |     |     |
|    |    |                 |         |   |   |           | ASL (conversion to perimitral flutter, MAL with epicardial bridge) <sup>c</sup>            | 7.2  |                                          |     |     |
| 29 | 6  | PentaRay Carto3 | LA      | 0 | 4 | AT        | PVI (STD+F at RSPV)                                                                        | 44.7 | LA: 37.5%                                | Yes | No  |
|    |    |                 |         |   |   |           | Posterior box (large area with STD+F)                                                      | 16.4 |                                          |     |     |
|    |    |                 |         |   |   |           | ASL (STD+F at anterior LA)                                                                 | 18.7 |                                          |     |     |
|    |    |                 |         |   |   |           | Focal at CS ostium (STD+F)                                                                 | 2.0  |                                          |     |     |
|    |    |                 |         |   |   |           | Focal at posterior septum from LA + RA (AF conversion to SRSR) + mini-line to RIPV         | 8.7  |                                          |     |     |
| 30 | 4  | PentaRay Carto3 | LA      | 1 | 3 | AT        | Gap at RIPV (prior PVI)                                                                    | 2.5  | LA: 29.5%                                | No  | No  |
|    |    |                 |         |   |   |           | ASL (FCEs at anteroseptal LA)                                                              | 12.3 |                                          |     |     |
|    |    |                 |         |   |   |           | Posterior box: roof line (STD+F) + line between RIPV and LIPV (STD+F at posterior LA wall) | 24.4 |                                          |     |     |
|    |    |                 |         |   |   |           | CS defragmentation (STD+F)                                                                 | 5.4  |                                          |     |     |

|    |    |                   |         |   |   |           |                                                                                                |              |              |     |    |
|----|----|-------------------|---------|---|---|-----------|------------------------------------------------------------------------------------------------|--------------|--------------|-----|----|
|    |    |                   |         |   |   |           | CTI (AF conversion to common atrial flutter)                                                   | 3.4          |              |     |    |
| 31 | 6  | PentaRay Carto3   | LA + RA | 0 | 4 | AT        | PVI (STD+F at posterior carina of right PVs)                                                   | 13.8         | LA: 7.3%     | No  | No |
|    |    |                   |         |   |   |           | ASL (STD+F at anterior LA) + mini-extension to LAA base (incomplete "Y-shape" line) (STD+F)    | 11.2         |              |     |    |
|    |    |                   |         |   |   |           | Line at posteroseptal mitral annulus (following CS trajectory) (STD+F)                         | 4.0          |              |     |    |
|    |    |                   |         |   |   |           | CTI (conversion to common atrial flutter)                                                      | 7.8          |              |     |    |
| 32 | 17 | HD Grid EnSite P. | LA + RA | 0 | 3 | No effect | PVI (STD+F at RIPV)                                                                            | 36.3         | LA: 16.1%    | No  | No |
|    |    |                   |         |   |   |           | Posterior box (large area with STD+F)                                                          | 9.6          |              |     |    |
|    |    |                   |         |   |   |           | CS defragmentation (STD+F)                                                                     | 7.7          |              |     |    |
|    |    |                   |         |   |   |           | CTI (common atrial flutter induced after CV)                                                   | 6.0          |              |     |    |
| 33 | 3  | ORION Rhythmia    | LA + RA | 0 | 3 | No effect | Gap at right middle PV (prior PVI)                                                             | 2.9          | LA: 12.8%    | No  | No |
|    |    |                   |         |   |   |           | Anterior extension of prior right PV isolation line (STD+F at RIPV antrum)                     | 7.3          |              |     |    |
|    |    |                   |         |   |   |           | Roof line (STD+F)                                                                              | 7.7          |              |     |    |
|    |    |                   |         |   |   |           | Posterior RA line between scars in relationship with SVC connection and IVC connection (STD+F) | 6.2          |              |     |    |
|    |    |                   |         |   |   |           | Empirical CS defragmentation (fractionation without true STD)                                  | 2.8          |              |     |    |
| 34 | 7  | PentaRay Carto3   | LA + RA | 0 | 2 | No effect | PVI                                                                                            | 21.4         | LA: 8.4%     | No  | No |
|    |    |                   |         |   |   |           | ASL (STD+F at anteroseptal LA)                                                                 | 11.0         |              |     |    |
|    |    |                   |         |   |   |           | MAL (STD+F at anterior LA) <sup>c</sup>                                                        | 4.7          |              |     |    |
|    |    |                   |         |   |   |           | Empirical CS defragmentation (fractionation without true STD)                                  | 7.9          |              |     |    |
| 35 | 18 | PentaRay Carto3   | LA      | 0 | 2 | No effect | PVI                                                                                            | 24.9         | LA: 5.7%     | Yes | No |
|    |    |                   |         |   |   |           | MAL (STD+F at anterior LA)                                                                     | 14.9         |              |     |    |
|    |    |                   |         |   |   |           | Line from transeptal puncture to RIPV (STD+F)                                                  | 2.6          |              |     |    |
| 36 | 60 | PentaRay Carto3   | LA      | 0 | 3 | No effect | PVI                                                                                            | 21.7         | LA: 7.8%     | No  | No |
|    |    |                   |         |   |   |           | Roof line (STD+F)                                                                              | 7.5          |              |     |    |
|    |    |                   |         |   |   |           | "T" line between roof line and anterior mitral annulus (STD+F at anterior LA)                  | 4.7          |              |     |    |
|    |    |                   |         |   |   |           | Focal at posteroseptal mitral annulus (facing CS ostium) (STD+F)                               | 3.8          |              |     |    |
| 37 | 19 | PentaRay Carto3   | LA + RA | 0 | 4 | No effect | PVI                                                                                            | <sup>d</sup> | <sup>d</sup> | Yes | No |
|    |    |                   |         |   |   |           | Posterior box: roof line (STD+F) + line between RIPV and LIPV (STD+F at posterior LA wall)     |              |              |     |    |
|    |    |                   |         |   |   |           | ASL (STD+F at anteroseptal LA)                                                                 |              |              |     |    |

|                                   |     |                     |            |   |   |              |                                                                                                                            |      |                                                |     |     |  |
|-----------------------------------|-----|---------------------|------------|---|---|--------------|----------------------------------------------------------------------------------------------------------------------------|------|------------------------------------------------|-----|-----|--|
|                                   |     |                     |            |   |   |              | MAL (STD+F at anterior LA near LAA base) <sup>c</sup>                                                                      |      |                                                |     |     |  |
| 38                                | 3   | HD Grid<br>EnSite X | LA +<br>RA | 0 | 1 | No<br>effect | PVI                                                                                                                        | 41.3 | LA: 6.8%<br>RA: 0%<br>Biatrial:<br>3.2%        | No  | No  |  |
|                                   |     |                     |            |   |   |              | Roof line (STD+F)                                                                                                          | 4.8  |                                                |     |     |  |
| 39                                | 38  | PentaRay<br>Carto3  | LA +<br>RA | 0 | 1 | AT           | Gap at LSPV (prior PVI)                                                                                                    | 8.8  | LA: 5.8%<br>RA: 0%<br>Biatrial:<br>2.7%        | No  | No  |  |
|                                   |     |                     |            |   |   |              | ASL (STD+F at anterior LA near RSPV antrum)<br><i>AF converted into a re-entrant AT with spontaneous termination to SR</i> | 8.6  |                                                |     |     |  |
| 40                                | 3   | HD Grid<br>EnSite X | LA +<br>RA | 1 | 2 | AT           | Anterior ablation of left PVs (wide gap from prior PVI; FCEs at left PVs carina and STD+F at superior aspect of ridge)     | 11.0 | LA: 2.8%<br>RA:<br>4.4%<br>Biatrial:<br>3.8%   | No  | No  |  |
|                                   |     |                     |            |   |   |              | Gap at RSPV (prior PVI)                                                                                                    | 2.6  |                                                |     |     |  |
|                                   |     |                     |            |   |   |              | Focal at superolateral RA (STD+F)                                                                                          | 4.5  |                                                |     |     |  |
|                                   |     |                     |            |   |   |              | CTI (AF conversion to common atrial flutter)                                                                               | 3.8  |                                                |     |     |  |
| 41                                | 5   | ORION<br>Rhythmia   | LA         | 1 | 2 | No<br>effect | PVI + posterior box with a single line (FCEs at posterior wall, STD+F at ridge and roof)                                   | 57.4 | LA: 29.7%                                      | No  | No  |  |
|                                   |     |                     |            |   |   |              | Focal at posteroseptal LA (spontaneous SRSR after CV)                                                                      | 3.0  |                                                |     |     |  |
|                                   |     |                     |            |   |   |              | Empirical CS defragmentation (fractionation without true STD)                                                              | 5.2  |                                                |     |     |  |
| 42                                | 2   | PentaRay<br>Carto3  | LA         | 0 | 0 | SR           | PVI (no drivers)<br><i>Spontaneous AF conversion to SR</i>                                                                 | 14.8 | LA: 11.6%                                      | No  | No  |  |
| 43                                | 6   | ORION<br>Rhythmia   | LA +<br>RA | 2 | 4 | No<br>effect | PVI (FCEs at ridge and STD+F at RSPV)                                                                                      | 39.8 | LA: 9.0%<br>RA: 0%<br>Biatrial:<br>4.4%        | Yes | No  |  |
|                                   |     |                     |            |   |   |              | ASL (FCEs at anterior LA)                                                                                                  | 10.4 |                                                |     |     |  |
|                                   |     |                     |            |   |   |              | MAL (2 sites with STD+F at LAA base) <sup>c</sup>                                                                          | 16.6 |                                                |     |     |  |
|                                   |     |                     |            |   |   |              | CS defragmentation (STD+F)                                                                                                 | 6.9  |                                                |     |     |  |
| 44                                | 5   | ORION<br>Rhythmia   | LA         | 0 | 2 | No<br>effect | PVI (STD+F at RSPV)                                                                                                        | 51.8 | LA: 8.2%                                       | No  | No  |  |
|                                   |     |                     |            |   |   |              | MAL (STD+F at anterior LA near LAA)                                                                                        | 11.4 |                                                |     |     |  |
| 45                                | 15  | PentaRay<br>Carto3  | LA +<br>RA | 0 | 4 | No<br>effect | PVI (STD+F at RIPV)                                                                                                        | 20.4 | LA: 8.6%<br>RA:<br>2.0%<br>Biatrial:<br>5.0%   | Yes | No  |  |
|                                   |     |                     |            |   |   |              | Roof line (STD+F)                                                                                                          | 3.5  |                                                |     |     |  |
|                                   |     |                     |            |   |   |              | Focal at CS ostium (STD+F)                                                                                                 | 5.0  |                                                |     |     |  |
|                                   |     |                     |            |   |   |              | Focal at lateral RA (STD+F)                                                                                                | 3.0  |                                                |     |     |  |
| 46                                | 7   | ORION<br>Rhythmia   | LA +<br>RA | 4 | 2 | No<br>effect | Gap at RIPV (prior PVI)                                                                                                    | 5.5  | LA: 16.1%<br>RA:<br>2.0%<br>Biatrial:<br>10.2% | Yes | Yes |  |
|                                   |     |                     |            |   |   |              | Posterior box (FCEs at posterior LA)                                                                                       | 10.1 |                                                |     |     |  |
|                                   |     |                     |            |   |   |              | ASL (FCEs at anterior mitral annulus and anterior LA near RSPV antrum)                                                     | 18.2 |                                                |     |     |  |
|                                   |     |                     |            |   |   |              | Focal at LAA anterior base (FCEs)                                                                                          | 3.9  |                                                |     |     |  |
|                                   |     |                     |            |   |   |              | Focal at superolateral RA (STD+F)                                                                                          | 3.4  |                                                |     |     |  |
| Focal at inferolateral RA (STD+F) | 1.0 |                     |            |   |   |              |                                                                                                                            |      |                                                |     |     |  |

|                                                                         |     |                    |            |   |   |           |                                                                                                                |      |                                                  |     |     |
|-------------------------------------------------------------------------|-----|--------------------|------------|---|---|-----------|----------------------------------------------------------------------------------------------------------------|------|--------------------------------------------------|-----|-----|
| 47                                                                      | 7   | PentaRay<br>Carto3 | LA +<br>RA | 0 | 4 | AT        | PVI                                                                                                            | 35.2 | LA:<br>11.7%<br>RA:<br>5.0%<br>Biatrial:<br>8.1% | No  | No  |
|                                                                         |     |                    |            |   |   |           | MAL (STD+F at anterior LA) + ASL (to achieve anterior LA block, epicardial bridge at MAL) <sup>c</sup>         | 12.6 |                                                  |     |     |
|                                                                         |     |                    |            |   |   |           | Focal at superolateral RA (STD+F)                                                                              | 1.5  |                                                  |     |     |
|                                                                         |     |                    |            |   |   |           | Focal at superoseptal RA (STD+F)                                                                               | 2.1  |                                                  |     |     |
|                                                                         |     |                    |            |   |   |           | CS defragmentation (STD+F)                                                                                     | 4.8  |                                                  |     |     |
|                                                                         |     |                    |            |   |   |           | Focal at crista terminalis (AF conversion to SRSR)                                                             | 3.7  |                                                  |     |     |
|                                                                         |     |                    |            |   |   |           | CTI (conversion to common atrial flutter)                                                                      | 7.5  |                                                  |     |     |
| 48                                                                      | 5   | PentaRay<br>Carto3 | LA         | 1 | 3 | AT        | <i>PVI performed in prior procedure, no gaps</i>                                                               |      | LA:<br>10.4%                                     | No  | No  |
|                                                                         |     |                    |            |   |   |           | Anterior extension of prior right PV isolation line (FCEs at RIPV antrum, STD+F at RSPV antrum)                | 15.7 |                                                  |     |     |
|                                                                         |     |                    |            |   |   |           | CS defragmentation (ostial STD+F) + line from LA facing CS trajectory (STD+F at posterolateral mitral annulus) | 15.9 |                                                  |     |     |
|                                                                         |     |                    |            |   |   |           | Focal at anterior mitral annulus (AF conversion to SRSR)                                                       | 1.2  |                                                  |     |     |
|                                                                         |     |                    |            |   |   |           | Focal at anteroseptal LA (SRSR conversion to another SRSR)                                                     | 2.0  |                                                  |     |     |
|                                                                         |     |                    |            |   |   |           | CTI (SRSR conversion to common atrial flutter)                                                                 | 6.5  |                                                  |     |     |
|                                                                         |     |                    |            |   |   |           | 49                                                                                                             | 14   |                                                  |     |     |
| Roof line (STD+F)                                                       | 2.3 |                    |            |   |   |           |                                                                                                                |      |                                                  |     |     |
| ASL (STD+F at anterior mitral annulus and anterior LA near RSPV antrum) | 6.9 |                    |            |   |   |           |                                                                                                                |      |                                                  |     |     |
| 50                                                                      | 84  | ORION<br>Rhythmia  | LA         | 2 | 4 | No effect | Gap at RIPV (prior PVI)                                                                                        | 2.4  | LA:<br>20.5%                                     | Yes | Yes |
|                                                                         |     |                    |            |   |   |           | Anterior extension of prior RSPV isolation line (FCEs at antrum)                                               | 5.0  |                                                  |     |     |
|                                                                         |     |                    |            |   |   |           | MAL (FCEs at LAA superior base and STD+F at LAA anterior base)                                                 | 7.9  |                                                  |     |     |
|                                                                         |     |                    |            |   |   |           | ASL (STD+F at superoseptal LA)                                                                                 | 6.3  |                                                  |     |     |
|                                                                         |     |                    |            |   |   |           | Posterior box (large area with STD+F)                                                                          | 19.7 |                                                  |     |     |
|                                                                         |     |                    |            |   |   |           | CS defragmentation (STD+F)                                                                                     | 8.2  |                                                  |     |     |

AF, atrial fibrillation; ASL, anteroseptal line (line between mitral annulus and right superior pulmonary vein); AT, atrial tachycardia; CS, coronary sinus; CTI, cavotricuspid isthmus; CV, cardioversion; EnSite P., EnSite Precision. FCEs, fractionated continuous or quasi-continuous electrograms; IVC, inferior vena cava; LA, left atrium; LAA, left atrial appendage; LIPV, left inferior



pulmonary vein; LSPV, left superior pulmonary vein; MAL, modified anterior line (line between mitral annulus and left superior pulmonary vein); PVs, pulmonary veins; PVI, pulmonary vein isolation; RA, right atrium; RF, radiofrequency; RIPV, right inferior pulmonary vein; RSPV, right superior pulmonary vein; SR: sinus rhythm; SRSR, scar-related small reentry; STD+F, spatiotemporal dispersion plus noncontinuous fractionation; SVC, superior vena cava.

<sup>a</sup> Ablation of sites with STD+F was only considered if no FCEs were found or after failed FCEs ablation. Hence, in patients with successful ablation of FCEs, this field has been codified as blank.

<sup>b</sup> See figure 1 of the supplementary data for the calculation method of the ablated area and examples of measurements.

<sup>c</sup> When an ASL and MAL were performed in the same patient, in some cases they shared the anterior connection to the mitral annulus (“Y-shape”). In the rest of cases, they were individually deployed (“V-shape”).

<sup>d</sup> Data on regional radiofrequency times and extension of atrial ablation surface could not be obtained from this patient due to loss of back-up files from the case.

**Table 4 of the supplementary data.** Atrial fibrillation cycle length at location of drivers and comparison with the cycle length obtained at neighboring regions of the index atrium ('atrial cycle length') without drivers or relevant fractionation in each patient. To measure cycle length at drivers' location, adjacent electrograms without fractionation were used in order to facilitate measurement.

| Patient # | Type of driver | Location                      | Effect of driver ablation | Driver cycle length, ms | Atrial cycle length, ms | $\Delta$ (driver cycle length - atrial cycle length) |
|-----------|----------------|-------------------------------|---------------------------|-------------------------|-------------------------|------------------------------------------------------|
| 1         | FCEs           | RSPV anterior antrum          | <b>AT</b>                 | 180                     | 185                     | -5                                                   |
| 2         | FCEs           | Anteroseptal LA               | No effect                 | 183                     | 196                     | -13                                                  |
|           | FCEs           | CS ostium                     | No effect                 | 179                     | 196                     | -17                                                  |
|           | STD+F          | LA roof                       | No effect                 | 171                     | 178                     | -7                                                   |
|           | STD+F          | LA posterior wall             | No effect                 | 189                     | 196                     | -7                                                   |
|           | STD+F          | Lateral RA                    | No effect                 | 195                     | 195                     | 0                                                    |
| 3         | FCEs           | Anterior aspect of LSPV       | <b>SR</b>                 | 178                     | 188                     | -10                                                  |
| 4         | STD+F          | LA roof                       | No effect                 | 143                     | 140                     | 3                                                    |
| 5         | STD+F          | RSPV anterior antrum          | No effect                 | 147                     | 150                     | -3                                                   |
|           | STD+F          | RIPV posterior antrum         | No effect                 | 134                     | 140                     | -6                                                   |
|           | STD+F          | LA roof                       | No effect                 | 144                     | 152                     | -8                                                   |
|           | STD+F          | CS                            | No effect                 | 159                     | 158                     | 1                                                    |
|           | STD+F          | Lateral RA                    | No effect                 | 145                     | 157                     | -12                                                  |
| 6         | FCEs           | RSPV anterior antrum          | <b>AT</b>                 | 163                     | 170                     | -7                                                   |
|           | FCEs           | Posterolateral mitral annulus | No effect                 | 149                     | 165                     | -16                                                  |
| 7         | No drivers     |                               |                           |                         |                         |                                                      |
| 8         | FCEs           | Near LAA anterior base        | <b>SR *</b>               | 137                     | 155                     | -18                                                  |
|           | FCEs           | Lateral RA (prior atriotomy)  | <b>SR *</b>               | 236                     | 264                     | -28                                                  |
| 9         | FCEs           | RSPV anterior antrum          | No effect                 | 140                     | 136                     | 4                                                    |
|           | FCEs           | Anterior LA near LAA base     | No effect                 | 117                     | 124                     | -7                                                   |
|           | STD+F          | Anterior mitral annulus       | No effect                 | 148                     | 148                     | 0                                                    |
|           | STD+F          | LA roof                       | No effect                 | 133                     | 154                     | -21                                                  |
|           | STD+F          | LA floor near RIPV            | No effect                 | 126                     | 129                     | -3                                                   |
|           | STD+F          | CS ostium                     | No effect                 | 145                     | 149                     | -4                                                   |
|           | STD+F          | Superolateral RA              | No effect                 | 126                     | 162                     | -36                                                  |
|           | STD+F          | Inferolateral RA              | No effect                 | 150                     | 152                     | -2                                                   |
| 10        | FCEs           | Posterior carina or right PVs | <b>SR</b>                 | 186                     | 192                     | -6                                                   |
| 11        | FCEs           | LA roof                       | No effect                 | 129                     | 155                     | -26                                                  |

|    |       |                              |           |     |     |            |
|----|-------|------------------------------|-----------|-----|-----|------------|
|    | FCEs  | LA anterior wall             | No effect | 163 | 142 | 21         |
|    | STD+F | LA posterior wall            | No effect | 146 | 155 | -9         |
|    | STD+F | RSPV anterior antrum         | No effect | 156 | 169 | -13        |
|    | STD+F | RIPV anterior antrum         | No effect | 166 | 178 | -12        |
|    | STD+F | CS ostium                    | No effect | 161 | 171 | -10        |
| 12 | STD+F | Anteroseptal LA              | No effect | 141 | 156 | -15        |
|    | STD+F | Anterior LA near LAA base    | No effect | 122 | 140 | -18        |
|    | STD+F | CS ostium                    | No effect | 155 | 150 | 5          |
|    | STD+F | Septal RA                    | No effect | 164 | 168 | -4         |
|    | STD+F | Lateral RA                   | No effect | 125 | 140 | -15        |
| 13 | STD+F | LA ridge                     | No effect | 143 | 152 | -9         |
|    | STD+F | LA roof                      | No effect | 157 | 164 | -7         |
|    | STD+F | Near anterior antrum of RSPV | No effect | 163 | 160 | 3          |
|    | STD+F | Anterior LA near LAA base    | No effect | 131 | 141 | -10        |
|    | STD+F | Septal RA                    | No effect | 171 | 176 | -5         |
| 14 | STD+F | LA roof                      | No effect | 97  | 110 | -13        |
|    | STD+F | LA posterior wall            | No effect | 88  | 121 | -33        |
|    | STD+F | Near anterior antrum of RSPV | No effect | 138 | 133 | 5          |
| 15 | STD+F | LA roof                      | No effect | 143 | 153 | -10        |
|    | STD+F | LA posterior wall            | No effect | 154 | 165 | -11        |
|    | STD+F | Anterior LA near LAA base    | No effect | 127 | 135 | -8         |
| 16 | STD+F | Near anterior antrum of RSPV | No effect | 160 | 168 | -8         |
|    | STD+F | LA roof                      | No effect | 144 | 139 | 5          |
|    | STD+F | LA posterior wall            | No effect | 124 | 136 | -12        |
|    | STD+F | LA anterior wall             | No effect | 142 | 141 | 1          |
|    | STD+F | Posteroseptal LA             | No effect | 152 | 143 | 9          |
|    | STD+F | Superolateral RA             | No effect | 157 | 168 | -11        |
|    | STD+F | Inferolateral RA             | No effect | 163 | 158 | 5          |
|    | STD+F | CS ostium                    | No effect | 141 | 169 | -28        |
| 17 | STD+F | LA ridge                     | No effect | 154 | 162 | -8         |
|    | STD+F | RSPV anterior antrum         | No effect | 169 | 179 | -10        |
|    | STD+F | LA anterior wall             | <b>AT</b> | 163 | 156 | <b>7</b>   |
| 18 | FCEs  | LA roof near LSPV            | <b>SR</b> | 170 | 181 | <b>-11</b> |
|    | FCEs  | Anterior mitral annulus      | No effect | 165 | 178 | -13        |
|    | FCEs  | Near anterior antrum of RSPV | No effect | 162 | 170 | -8         |
| 19 | FCEs  | Near anterior antrum of RSPV | No effect | 137 | 157 | -20        |
|    | FCEs  | LA posterior wall            | <b>AT</b> | 153 | 158 | <b>-5</b>  |
|    | STD+F | Anterior LA                  | No effect | 145 | 152 | -7         |
|    | STD+F | Anterior LA near LAA base    | No effect | 163 | 161 | 2          |

|    |       |                            |           |     |     |     |
|----|-------|----------------------------|-----------|-----|-----|-----|
|    | STD+F | CS ostium                  | No effect | 165 | 163 | 2   |
|    | STD+F | CS                         | No effect | 160 | 142 | 18  |
| 20 | STD+F | RSPV anterior antrum       | No effect | 221 | 191 | 30  |
|    | STD+F | Near RSPV roof             | No effect | 145 | 183 | -38 |
|    | STD+F | Near posterior RSPV antrum | No effect | 150 | 164 | -14 |
|    | STD+F | LIPV inferior antrum       | <b>SR</b> | 189 | 193 | -4  |
| 21 | FCEs  | LA ridge                   | No effect | 157 | 141 | 16  |
|    | FCEs  | LA roof                    | No effect | 128 | 140 | -12 |
|    | STD+F | LA anterior wall           | No effect | 150 | 157 | -7  |
|    | STD+F | CS                         | No effect | 159 | 155 | 4   |
|    | STD+F | Crista terminalis          | No effect | 155 | 163 | -8  |
| 22 | FCEs  | RSPV anterior antrum       | No effect | 176 | 192 | -16 |
|    | FCEs  | RIPV inferior antrum       | No effect | 166 | 187 | -21 |
|    | FCEs  | LIPV inferior antrum       | No effect | 180 | 178 | 2   |
|    | FCEs  | LA ridge                   | No effect | 174 | 191 | -17 |
|    | FCEs  | LA roof                    | <b>SR</b> | 180 | 192 | -12 |
| 23 | STD+F | RSPV anterior antrum       | No effect | 163 | 144 | 19  |
|    | STD+F | LA posterior wall          | No effect | 157 | 175 | -18 |
|    | STD+F | LA anterior wall           | No effect | 137 | 154 | -17 |
|    | STD+F | Anterior LA near LAA base  | <b>AT</b> | 145 | 148 | -3  |
| 24 | STD+F | RSPV anterior antrum       | No effect | 170 | 182 | -12 |
|    | STD+F | LA posterior wall          | No effect | 152 | 168 | -16 |
|    | STD+F | Anterior LA near LAA base  | No effect | 173 | 158 | 15  |
|    | STD+F | Mitral isthmus             | No effect | 165 | 168 | -3  |
|    | STD+F | Inferolateral RA           | No effect | 208 | 194 | 14  |
| 25 | STD+F | RSPV anterior antrum       | No effect | 210 | 213 | -3  |
|    | STD+F | LA roof                    | No effect | 205 | 229 | -24 |
|    | STD+F | LA posterior wall          | <b>AT</b> | 199 | 220 | -21 |
| 26 | FCEs  | RSPV anterior antrum       | No effect | 144 | 140 | 4   |
|    | FCEs  | LA roof                    | No effect | 125 | 135 | -10 |
|    | STD+F | LA posterior wall          | No effect | 128 | 120 | 8   |
|    | STD+F | LA anterior wall           | No effect | 139 | 136 | 3   |
|    | STD+F | LA ridge                   | <b>AT</b> | 131 | 138 | -7  |
|    | STD+F | CS                         | No effect | 136 | 146 | -10 |
| 27 | STD+F | RSPV anterior antrum       | No effect | 198 | 206 | -8  |
|    | STD+F | LA ridge                   | No effect | 190 | 172 | 18  |
|    | STD+F | Anterior LA near LAA base  | No effect | 165 | 205 | -40 |
|    | STD+F | LA posterior wall          | No effect | 169 | 192 | -23 |
|    | STD+F | CS                         | No effect | 177 | 184 | -7  |

|    |       |                               |           |     |     |            |
|----|-------|-------------------------------|-----------|-----|-----|------------|
| 28 | STD+F | LA roof                       | No effect | 151 | 183 | -32        |
|    | STD+F | LA posterior wall             | No effect | 149 | 152 | -3         |
|    | STD+F | Anterior LA near LAA base     | No effect | 156 | 163 | -7         |
|    | STD+F | CS                            | <b>AT</b> | 173 | 177 | <b>-4</b>  |
| 29 | STD+F | Near anterior antrum of RSPV  | No effect | 153 | 164 | -11        |
|    | STD+F | LA posterior wall             | No effect | 170 | 172 | -2         |
|    | STD+F | LA anterior wall              | No effect | 145 | 168 | -23        |
|    | STD+F | CS ostium                     | <b>AT</b> | 180 | 201 | <b>-21</b> |
| 30 | FCEs  | Anteroseptal LA               | No effect | 238 | 221 | 17         |
|    | STD+F | LA roof                       | No effect | 202 | 217 | -15        |
|    | STD+F | LA posterior wall             | No effect | 217 | 233 | -16        |
|    | STD+F | CS                            | <b>AT</b> | 222 | 206 | <b>16</b>  |
| 31 | STD+F | Posterior carina of right PVs | No effect | 157 | 168 | -11        |
|    | STD+F | LA anterior wall              | No effect | 153 | 133 | 20         |
|    | STD+F | Anterior LA near LAA base     | No effect | 132 | 137 | -5         |
|    | STD+F | Posteroseptal mitral annulus  | <b>AT</b> | 140 | 145 | <b>-5</b>  |
| 32 | STD+F | RIPV inferior antrum          | No effect | 141 | 150 | -9         |
|    | STD+F | Posterior LA wall             | No effect | 136 | 148 | -12        |
|    | STD+F | CS                            | No effect | 165 | 174 | -9         |
| 33 | STD+F | Near anterior antrum of RIPV  | No effect | 126 | 146 | -20        |
|    | STD+F | LA roof                       | No effect | 142 | 150 | -8         |
|    | STD+F | Posterior RA                  | No effect | 151 | 153 | -2         |
| 34 | STD+F | Anteroseptal LA               | No effect | 171 | 179 | -8         |
|    | STD+F | LA anterior wall              | No effect | 155 | 159 | -4         |
| 35 | STD+F | LA anterior wall              | No effect | 184 | 176 | 8          |
|    | STD+F | Posteroseptal LA              | No effect | 178 | 192 | -14        |
| 36 | STD+F | LA roof                       | No effect | 140 | 154 | -14        |
|    | STD+F | LA anterior wall              | No effect | 157 | 171 | -14        |
|    | STD+F | Posteroseptal mitral annulus  | No effect | 165 | 179 | -14        |
| 37 | STD+F | LA roof                       | No effect | 181 | 180 | 1          |
|    | STD+F | LA posterior wall             | No effect | 178 | 172 | 6          |
|    | STD+F | Anteroseptal LA               | No effect | 182 | 191 | -9         |
|    | STD+F | Anterior LA near LAA          | No effect | 167 | 174 | -7         |
| 38 | STD+F | LA roof                       | No effect | 145 | 157 | -12        |
| 39 | STD+F | Anterior LA near RSPV antrum  | <b>AT</b> | 132 | 152 | <b>-20</b> |
| 40 | FCEs  | Carina of left PVs            | No effect | 135 | 142 | -7         |
|    | STD+F | LA ridge                      | No effect | 141 | 147 | -6         |
|    | STD+F | Superolateral RA              | <b>AT</b> | 131 | 140 | <b>-9</b>  |
| 41 | FCEs  | LA posterior wall             | No effect | 197 | 165 | 32         |

|    |            |                               |           |     |     |     |
|----|------------|-------------------------------|-----------|-----|-----|-----|
|    | STD+F      | LA ridge                      | No effect | 184 | 197 | -13 |
|    | STD+F      | LA roof                       | No effect | 189 | 173 | 16  |
| 42 | No drivers |                               |           |     |     |     |
| 43 | FCEs       | LA ridge                      | No effect | 152 | 151 | 1   |
|    | FCEs       | LA anteroseptal wall          | No effect | 165 | 175 | -10 |
|    | STD+F      | RSPV anterior antrum          | No effect | 152 | 182 | -30 |
|    | STD+F      | LA roof near LAA base         | No effect | 163 | 159 | 4   |
|    | STD+F      | Anterior LA near LAA base     | No effect | 149 | 148 | 1   |
|    | STD+F      | CS                            | No effect | 147 | 157 | -10 |
| 44 | STD+F      | RSPV anterior antrum          | No effect | 156 | 172 | -16 |
|    | STD+F      | Anterior LA near LAA base     | No effect | 140 | 148 | -8  |
| 45 | STD+F      | RIPV                          | No effect | 164 | 179 | -15 |
|    | STD+F      | LA roof                       | No effect | 155 | 158 | -3  |
|    | STD+F      | CS ostium                     | No effect | 188 | 184 | 4   |
|    | STD+F      | Lateral RA                    | No effect | 164 | 171 | -7  |
| 46 | FCEs       | LA posterior wall             | No effect | 175 | 179 | -4  |
|    | FCEs       | Anterior mitral annulus       | No effect | 151 | 153 | -2  |
|    | STD+F      | Anterior LA near RSPV antrum  | No effect | 153 | 160 | -7  |
|    | STD+F      | LA near LAA anterior base     | No effect | 160 | 164 | -4  |
|    | STD+F      | Superolateral RA              | No effect | 185 | 172 | 13  |
|    | STD+F      | Inferolateral RA              | No effect | 191 | 197 | -6  |
| 47 | STD+F      | LA anterior wall              | No effect | 164 | 156 | 8   |
|    | STD+F      | Superolateral RA              | No effect | 124 | 153 | -29 |
|    | STD+F      | Superoseptal RA               | No effect | 144 | 147 | -3  |
|    | STD+F      | CS                            | <b>AT</b> | 146 | 153 | -7  |
| 48 | FCEs       | RIPV inferior antrum          | <b>AT</b> | 173 | 180 | -7  |
|    | STD+F      | Near anterior antrum of RSPV  | No effect | 183 | 179 | 4   |
|    | STD+F      | Posterolateral mitral annulus | No effect | 179 | 174 | 5   |
|    | STD+F      | CS ostium                     | No effect | 184 | 174 | 10  |
| 49 | FCEs       | RSPV superior antrum          | No effect | 180 | 194 | -14 |
|    | STD+F      | LA ridge                      | No effect | 197 | 193 | 4   |
|    | STD+F      | LA roof                       | No effect | 210 | 210 | 0   |
|    | STD+F      | Anterior mitral annulus       | No effect | 194 | 200 | -6  |
|    | STD+F      | Anterior LA near RSPV antrum  | No effect | 177 | 201 | -24 |
| 50 | FCEs       | Near anterior antrum of RSPV  | No effect | 134 | 140 | -6  |
|    | FCEs       | LAA superior base             | No effect | 130 | 136 | -6  |
|    | STD+F      | LA near anterior LAA base     | No effect | 123 | 136 | -13 |
|    | STD+F      | Superoseptal LA               | No effect | 142 | 130 | 12  |
|    | STD+F      | LA posterior wall             | No effect | 139 | 140 | -1  |

|  |       |    |           |     |     |    |
|--|-------|----|-----------|-----|-----|----|
|  | STD+F | CS | No effect | 159 | 164 | -5 |
|--|-------|----|-----------|-----|-----|----|

AT, atrial tachycardia; CS, coronary sinus; FCEs, fractionated continuous or quasi-continuous electrograms; LA, left atrium; LAA, left atrial appendage; LIPV, left inferior pulmonary vein; LSPV, left superior pulmonary vein; PVs, pulmonary veins; RA, right atrium; RAA, right atrial appendage; RIPV, right inferior pulmonary vein; RSPV, right superior pulmonary vein; STD+F, spatiotemporal dispersion plus noncontinuous fractionation.

\* In this patient, ablation achieved AF conversion near the anterior base of the LAA, but AF reappeared; AF conversion was again achieved in the RA, at the superior edge of a prior atriotomy scar.

FIGURE 1 OF THE SUPPLEMENTARY DATA

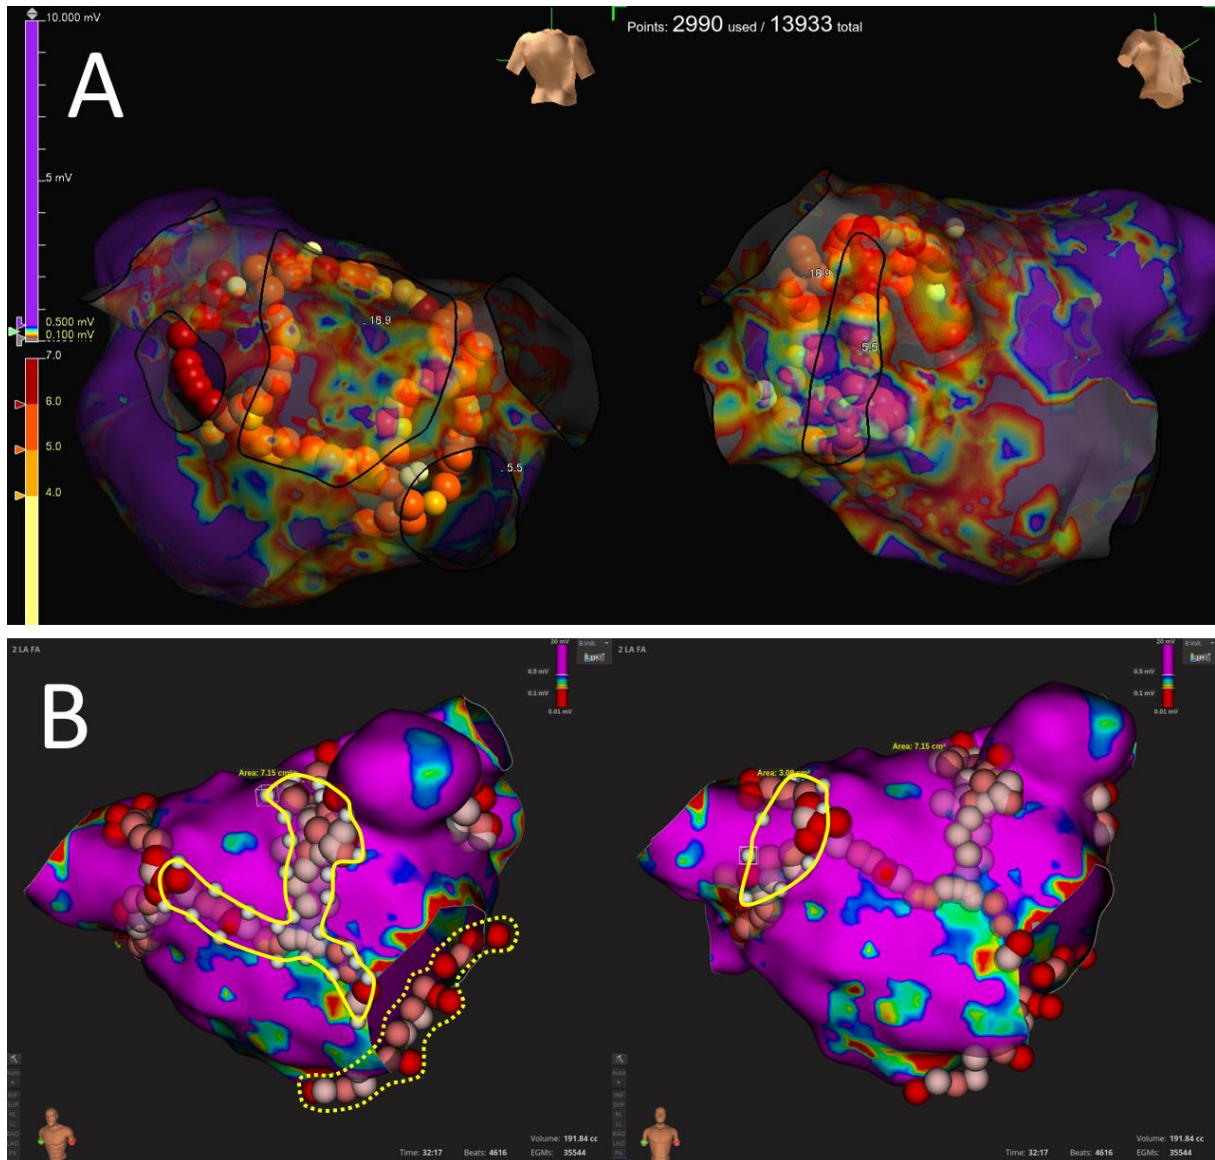

Examples of measurements of the atrial ablated area. To compute the ablated surface, lines were manually drawn on maps enclosing ablated areas using the available tools for each navigation system, and resulting areas were summed. For ablation lines, a width of ~6 mm, matching the diameter of ablation automatic marks, was used for area calculation. Electrically isolated areas due to adjacent RF lesions (eg, posterior box, antrum of pulmonary veins inside a circumferential PVI) were added into the ablated area. Pulmonary vein tissue was excluded from measurements. A) Measurements of a posterior box area and the antral aspect of the right pulmonary veins using EnSite X. B)



Measurements of a Y-shaped anterior mitral line with peri-LAA reinforcement and the antral aspect of the right superior pulmonary vein using Rhythmia; areas are highlighted using yellow solid lines for better visualization. For calculation of the ablated antral aspect of pulmonary veins, only the area *outside* an imaginary ostial PVI circumference was considered. Ablation inside the coronary sinus (as in cases with coronary sinus defragmentation) was not included in the ablated area calculation, as seen in panel B (dashed yellow line).

FIGURE 2 OF THE SUPPLEMENTARY DATA

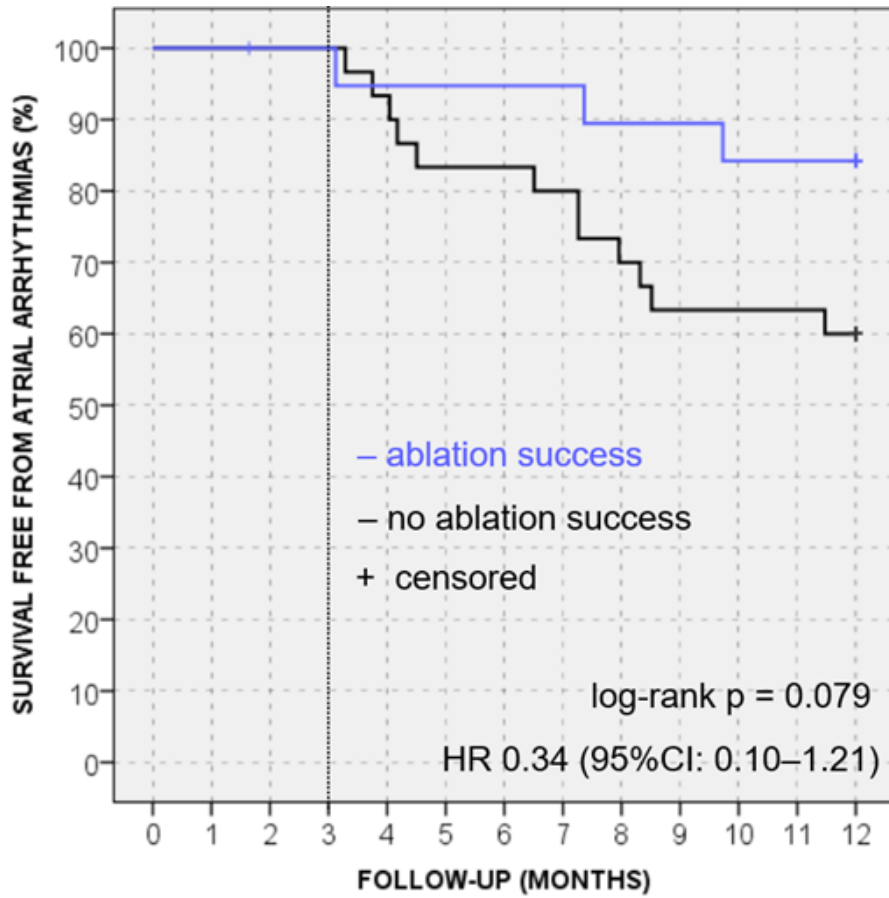

| No. at risk         |                                        |
|---------------------|----------------------------------------|
| Ablation success    | 20 20 19 19 18 18 18 18 17 17 16 16 16 |
| No ablation success | 30 30 30 30 28 25 25 24 21 19 19 19 18 |

Estimated 1-year survival free from atrial arrhythmias, excluding a 3-month blanking period, in patients from the pulmonary vein isolation plus driver ablation group with and without ablation success at the index procedure.

FIGURE 3 OF THE SUPPLEMENTARY DATA

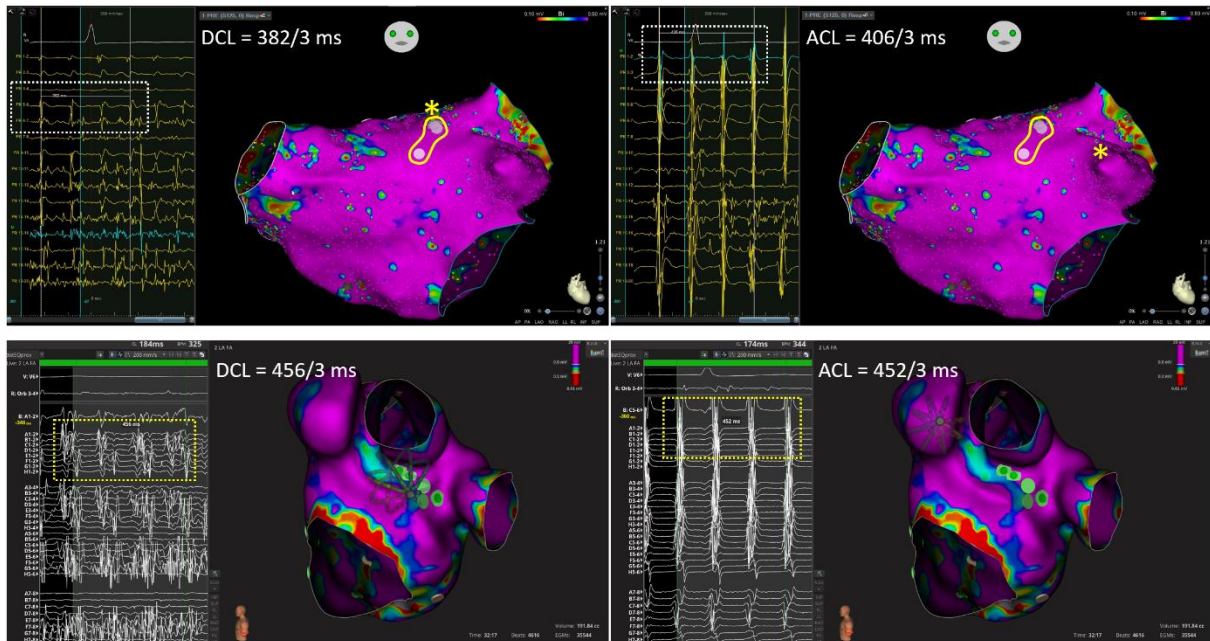

Atrial fibrillation cycle length (CL) measurements at sites with drivers (left panels) and at neighboring sites without drivers (right panels). To measure CL, the mean of 3 consecutive cycle lengths using a bipole without relevant fractionation and visually representative of the ‘regional’ cycle length (dashed lines) was calculated. In the upper panels (Carto3), the PentaRay position which was used for measurements is marked with an asterisk for better visualization. In the lower panels (Rhythmia), a catheter shadow shows the position of the ORION catheter. DCL, driver cycle length; ACL, atrial cycle length (cycle length measured in a near nondriver position).

FIGURE 4 OF THE SUPPLEMENTARY DATA

**A** ONE-YEAR FOLLOW-UP / SINGLE PROCEDURE

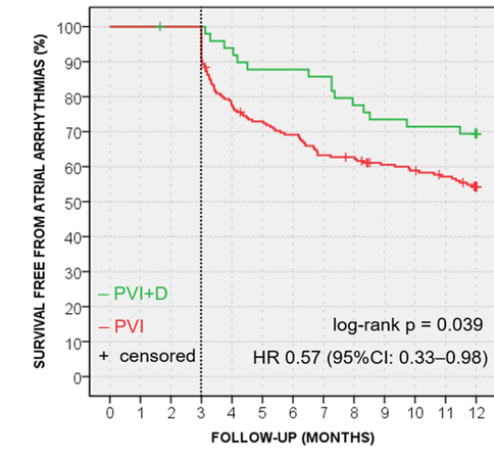

| No. at risk |                                                    |
|-------------|----------------------------------------------------|
| PVI+D       | 50 50 49 49 46 43 43 42 38 36 35 35 34             |
| PVI         | 189 189 189 189 146 136 129 118 116 108 105 100 93 |

**B** EXTENDED FOLLOW-UP / SINGLE PROCEDURE

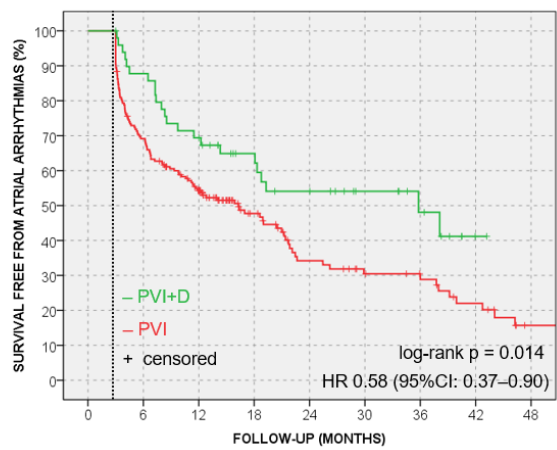

| No. at risk |                             |
|-------------|-----------------------------|
| PVI+D       | 50 43 34 24 19 12 8 1       |
| PVI         | 189 129 93 47 29 22 19 12 4 |

**C** EXTENDED FOLLOW-UP / MULTIPLE PROCEDURES

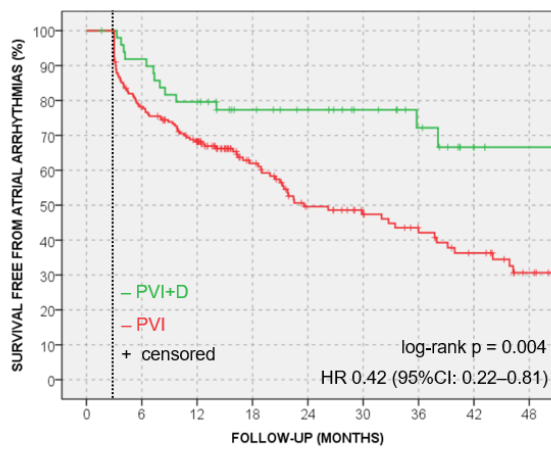

| No. at risk |                               |
|-------------|-------------------------------|
| PVI+D       | 50 45 39 30 26 19 14 6 3      |
| PVI         | 189 145 118 70 48 39 31 23 13 |

**D** PROGRESSION TO PERMANENT ATRIAL FIBRILLATION

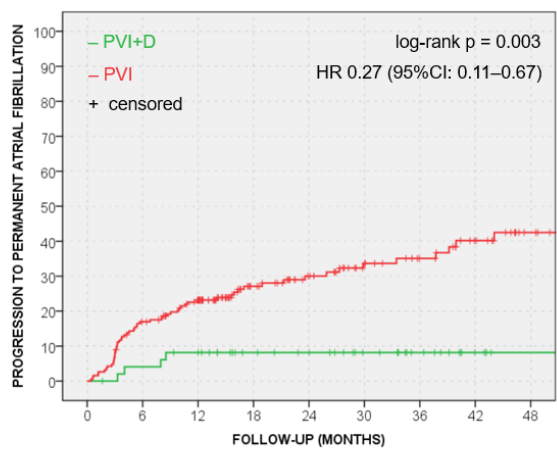

| No. at risk |                               |
|-------------|-------------------------------|
| PVI+D       | 50 47 44 34 31 23 16 8 4      |
| PVI         | 189 154 133 82 65 50 41 30 18 |

Kaplan-Meier plots of primary and secondary endpoints including all patients in the PVI-only group. A: survival free from atrial arrhythmias at 1 year of follow-up. B: survival free from atrial arrhythmia recurrences at extended follow-up. C: survival free from atrial arrhythmia recurrences at extended follow-up after multiple ablation procedures. D: progression to permanent AF. PVI+D, pulmonary vein isolation plus driver ablation group; PVI, pulmonary vein isolation-only group.
